# Supplementary material for: A 2D Dy-based metal–organic framework derived from benzothiadiazole: structure and photocatalytic properties
Source: Royal Society of Chemistry journal article supplement (doi:10.1039/d2dt03606a), 2023-01-01
Supplement: d2dt03606a1.pdf [file d2dt03606a1.pdf]

## *Supporting Information*

### **A 2D Dy-Based Metal–Organic Framework Derived from Benzothiadiazole: Structure and Photocatalytic Properties**

Jing Zhu<sup>a</sup>, Lin Hua<sup>b</sup>, Yumeng Zhang<sup>a</sup>, Hongying Wu<sup>b</sup>, Fuwei Zheng<sup>b</sup>, Hongyan Shen<sup>b</sup>, Haiyan Gong<sup>c,\*</sup>, Liu Yang<sup>b,\*</sup>, Aiyun Jiang<sup>a,\*</sup>

<sup>a</sup> Huanghe Science and Technology College, Zhengzhou, Henan 450063, China.

<sup>b</sup> Institute of Chemistry Co. Ltd Henan Academy of Sciences, Zhengzhou, 450002, P. R. China

<sup>c</sup> Academy of Chinese Medical Sciences, Henan University of Chinese Medicine, Zhengzhou 450046, Henan, China

\*Correspondence Email: aiyunjiang@126.com, ghy\_mz@163.com, 13937102338@139.com.

---

**Table of Contents:**

| <b>Supporting Tables</b>  |                                                                                                                                                     |
|---------------------------|-----------------------------------------------------------------------------------------------------------------------------------------------------|
| <b>Table S1</b>           | Crystallographic data of the complex MOL 1.                                                                                                         |
| <b>Table S2</b>           | Selected bond lengths (Å) and angles (°) of complex MOL 1.                                                                                          |
| <b>Table S3</b>           | <i>SHAPE</i> analysis of the Dy1 ion in MOL 1.                                                                                                      |
| <b>Table S4</b>           | Computed oxidation potential of chalcone.                                                                                                           |
| <b>Supporting Figures</b> |                                                                                                                                                     |
| <b>Scheme S1</b>          | A photo of the reactor under 30 W LED light.                                                                                                        |
| <b>Figure S1</b>          | The coordinated environment of Dy(III) ion.                                                                                                         |
| <b>Figure S2</b>          | a) $n = 2$ , the <i>Tauc</i> plot of MOL 1; b) $n = 1/2$ , the <i>Tauc</i> plot of MOL 1.                                                           |
| <b>Figure S3</b>          | GC-MS spectrum of <b>1a</b> and <b>1c</b> .                                                                                                         |
| <b>Figure S4</b>          | a) Yields of <b>1c</b> in different solvents; b) the influence of irradiation time on the amount of <b>1c</b> ; c) the PXRD of photocatalyst MOL 1. |
| <b>Figure S5</b>          | The TEM image for MOL 1 (a) and the morphology after reaction (b).                                                                                  |
| <b>Figure S6</b>          | Isothermal adsorption/desorption curve of MOL 1.                                                                                                    |
| <b>Figure S7-S13</b>      | <sup>1</sup> H NMR spectra for <b>1c~1i</b> .                                                                                                       |
| <b>Figure S14</b>         | The calculated valence band hole (a) and conduction band electron (b) for MOL 1.                                                                    |
| <b>Figure S15</b>         | The $E_{\text{ads}}$ of species involved in synthesizing flavonoid by chalcone with MOL 1.                                                          |

---

## Experimental Section

### Materials and Measurements.

All reagents and solvents are commercially available (Beijing innoChem Science & Technology Co. Ltd.), and they were further dried by the vacuum rotary evaporator to remove all traces of water and then stored in the N<sub>2</sub>-filled glovebox. The 15 mL Schlenk tube charged with a magnetic stirrer, which was used as the reactor (Scheme S1). The visible light ( $\lambda = 450$  nm) was provided by a 30 W LED light.

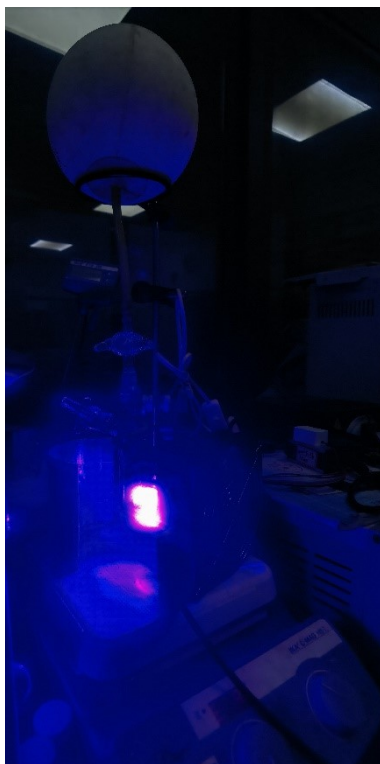

Scheme S1. A photo of the reactor under 30 W LED light.

The chemical structures of the products were confirmed by comparison with standard chemicals and GC-MS (Agilent Technologies, GC 7890B, MS 5977A) data. GC equipped with a FID detector (Agilent Technologies, GC 7890 B) and a HP-5 5% phenyl methyl siloxane column (30m  $\times$  0.32mm  $\times$  0.5  $\mu$ m), which was used for the quantifiable measure of flavonoid. <sup>1</sup>H NMR spectra was recorded on a Bruker UltraShield Plus Avance III (600 MHz). Peaks were referenced to residual solvent (DMSO). All products are tested after column purification.

A Varian Cary 500 UV-Vis spectrophotometer was used to record the UV-Vis diffuse reflectance spectra (DRS) of various solid samples. The photoelectrochemical characterization was performed on a Metrohm-Autolab AUT302N Electrochemical workstation. Photocurrent measurements were carried out in a typical three-electrode configuration with an Ag/AgCl electrode, a coiled Pt wire as the reference and counter electrode, respectively. X-ray diffraction (XRD) studies of catalyst were

---

carried out with a Bruker D8 Advance instrument. The electron paramagnetic resonance (EPR) experiments were carried out on Bruker A300 instrument operating in the X-band at room temperature.

### Single-crystal X-ray crystallography.

Diffraction data for all complexes were measured on a Bruker SMART CCD diffractometer (Mo  $K\alpha$  radiation and  $\lambda = 0.71073 \text{ \AA}$ ) in  $\Phi$  and  $\omega$  scan modes. All structures were solved by direct methods, followed by difference Fourier syntheses, and then refined by full-matrix least-squares techniques on  $F^2$  using SHELXL.<sup>1</sup> All other non-hydrogen atoms were refined with anisotropic thermal parameters. Hydrogen atoms were placed in the calculated position and refined in the isotropic direction using a riding model. Table S1 summarizes X-ray crystallographic data and refinement details for the complexes. The CCDC reference number is 2189705 for MOL 1. The coordination parameters of Dy(III) central coordination chemistry are completed by the *SHAPE* 2.0 program.<sup>2</sup>

### Computational Studies

All computations were carried out using density functional theory (DFT)<sup>3</sup> implemented in Gaussian 09 suite of program.<sup>4</sup> Geometry optimizations were performed in the gas phase with M06-2X<sup>5</sup> levels of theory and 6-31G\*\* basis set. After geometry optimizations, the energies were re-evaluated with optimized structures under M06-2X level and 6-311+G\*\* basis set. Solvation energy corrections were carried out at the same level of the single point energy calculations using SMD<sup>6</sup> model (solvent = acetonitrile), where the solution phase electronic energies ( $E_{\text{Sol}}$ ) were evaluated. Vibrational frequency calculations were conducted at the same level as the geometry optimizations, to derive the thermochemistry correction term ( $G - E$ ) as well as to confirm the stationary points as either minima (no imaginary frequencies) or saddle points (one imaginary frequency) on the potential energy surface. Final solution phase Gibbs free energies ( $G_{\text{Sol}}$ ) were computed as follows:

$$G_{\text{Sol}} = E_{\text{Sol}} + (G - E) \quad (1)$$

$$\Delta G_{\text{Sol}} = \Sigma G_{\text{Sol}} \text{ for products} - \Sigma G_{\text{Sol}} \text{ for reactants} \quad (2)$$

### Synthesis of complex MOL 1.

Adding 37.6 mg  $\text{H}_2\text{L}$  ligand (0.1 mmol), and  $\text{Dy}(\text{NO}_3)_3 \cdot 6\text{H}_2\text{O}$  (0.05 mmol) in 9 mL DMF and 1 mL  $\text{H}_2\text{O}$ , then stirred 30 minutes in 15 mL polytetrafluoroethylene reactor, the reactor was heated at 140 °C for 72 h. Then the reaction was terminated, the polytetrafluoroethylene reactor was cooled to room temperature, yellow strip crystals were obtained. The crystals were washed 2-3 times with DMF solvent for characterization and reaction. Yield: 76% (based on  $\text{Dy}(\text{NO}_3)_3 \cdot 6\text{H}_2\text{O}$ ). Elemental analyses *calc.* (%) for  $[\text{Dy}(\text{C}_{20}\text{H}_{10}\text{N}_2\text{O}_4\text{S})_2]_n \cdot (\text{C}_2\text{H}_8\text{N})_n$ : C 52.69, H 2.95, N 7.32. Found: C 52.74, H 3.01, N 7.29.

**Table S1.** Crystallographic data of the complex MOL 1.

| <b>Complex</b>                                                  | <b>MOL 1</b>                                                                   |
|-----------------------------------------------------------------|--------------------------------------------------------------------------------|
| Formula                                                         | C <sub>42</sub> H <sub>28</sub> DyN <sub>5</sub> O <sub>8</sub> S <sub>2</sub> |
| Formula weight                                                  | 957.31                                                                         |
| <i>T</i> (K)                                                    | 100.00 (10)                                                                    |
| Crystal system                                                  | Triclinic                                                                      |
| Space group                                                     | <i>P</i> -1                                                                    |
| <i>a</i> (Å)                                                    | 7.74310 (10)                                                                   |
| <i>b</i> (Å)                                                    | 13.8979 (2)                                                                    |
| <i>c</i> (Å)                                                    | 18.5548 (2)                                                                    |
| $\alpha$ (°)                                                    | 105.0820 (10)                                                                  |
| $\beta$ (°)                                                     | 101.8790 (10)                                                                  |
| $\gamma$ (°)                                                    | 91.5980 (10)                                                                   |
| <i>V</i> (Å <sup>3</sup> )                                      | 1879.64 (4)                                                                    |
| <i>Z</i>                                                        | 2                                                                              |
| <i>D</i> <sub>c</sub> (g cm <sup>-3</sup> )                     | 1.691                                                                          |
| $\mu$ (mm <sup>-1</sup> )                                       | 11.304                                                                         |
| Reflns coll.                                                    | 24315                                                                          |
| Unique reflns                                                   | 6637                                                                           |
| <i>R</i> <sub>int</sub>                                         | 0.0403                                                                         |
| <sup>a</sup> <i>R</i> <sub>1</sub> [ <i>I</i> ≥ 2σ( <i>I</i> )] | 0.0368                                                                         |
| <sup>b</sup> <i>wR</i> <sub>2</sub> (all data)                  | 0.0998                                                                         |
| GOF                                                             | 1.026                                                                          |

$$^aR_1 = \Sigma||F_o| - |F_c|| / \Sigma|F_o|, \quad ^b wR_2 = [\Sigma w(F_o^2 - F_c^2)^2 / \Sigma w(F_o^2)]^{1/2}$$

**Table S2.** Selected bond lengths (Å) and angles (°) of complex MOL 1.

| MOL 1                                                                                                       |             |                                         |             |                                         |             |
|-------------------------------------------------------------------------------------------------------------|-------------|-----------------------------------------|-------------|-----------------------------------------|-------------|
| Bond lengths (Å)                                                                                            |             |                                         |             |                                         |             |
| O5—Dy1                                                                                                      | 2.323 (3)   | O8—Dy1 <sup>ii</sup>                    | 2.352 (3)   | O4—Dy1 <sup>i</sup>                     | 2.451 (3)   |
| O3—Dy1 <sup>i</sup>                                                                                         | 2.557 (3)   | O2—Dy1                                  | 2.533 (3)   | O6—Dy1 <sup>iii</sup>                   | 2.347 (3)   |
| O7—Dy1 <sup>i</sup>                                                                                         | 2.316 (3)   | O1—Dy1                                  | 2.445 (3)   |                                         |             |
| Bond angles (°)                                                                                             |             |                                         |             |                                         |             |
| O5—Dy1—O3 <sup>iv</sup>                                                                                     | 159.15 (11) | O7 <sup>iv</sup> —Dy1—O1                | 146.37 (10) | O1—Dy1—O2                               | 52.49 (10)  |
| O5—Dy1—O8 <sup>ii</sup>                                                                                     | 78.85 (10)  | O7 <sup>iv</sup> —Dy1—O4 <sup>iv</sup>  | 75.39 (11)  | O1—Dy1—O4 <sup>iv</sup>                 | 130.27 (11) |
| O5—Dy1—O2                                                                                                   | 95.39 (10)  | O7 <sup>iv</sup> —Dy1—O6 <sup>iii</sup> | 76.68 (10)  | O4 <sup>iv</sup> —Dy1—O3 <sup>iv</sup>  | 52.20 (10)  |
| O5—Dy1—O1                                                                                                   | 77.07 (11)  | O8 <sup>ii</sup> —Dy1—O3 <sup>iv</sup>  | 116.66 (10) | O4 <sup>iv</sup> —Dy1—O2                | 92.66 (10)  |
| O5—Dy1—O4 <sup>iv</sup>                                                                                     | 148.55 (10) | O8 <sup>ii</sup> —Dy1—O2                | 72.77 (10)  | O6 <sup>iii</sup> —Dy1—O3 <sup>iv</sup> | 75.44 (10)  |
| O5—Dy1—O6 <sup>iii</sup>                                                                                    | 92.56 (10)  | O8 <sup>ii</sup> —Dy1—O1                | 116.46 (10) | O6 <sup>iii</sup> —Dy1—O8 <sup>ii</sup> | 163.66 (11) |
| O7 <sup>iv</sup> —Dy1—O5                                                                                    | 87.65 (11)  | O8 <sup>ii</sup> —Dy1—O4 <sup>iv</sup>  | 74.63 (10)  | O6 <sup>iii</sup> —Dy1—O2               | 122.30 (10) |
| O7 <sup>iv</sup> —Dy1—O3 <sup>iv</sup>                                                                      | 105.59 (10) | O2—Dy1—O3 <sup>iv</sup>                 | 77.57 (10)  | O6 <sup>iii</sup> —Dy1—O1               | 74.32 (10)  |
| O7 <sup>iv</sup> —Dy1—O8 <sup>ii</sup>                                                                      | 89.00 (10)  | O1—Dy1—O3 <sup>iv</sup>                 | 83.22 (10)  | O6 <sup>iii</sup> —Dy1—O4 <sup>iv</sup> | 108.56 (10) |
| O7 <sup>iv</sup> —Dy1—O2                                                                                    | 160.48 (10) |                                         |             |                                         |             |
| Symmetry codes: (i) $x+1, y, z+1$ ; (ii) $-x+1, -y+1, -z+1$ ; (iii) $-x+1, -y+1, -z$ ; (iv) $x-1, y, z-1$ . |             |                                         |             |                                         |             |

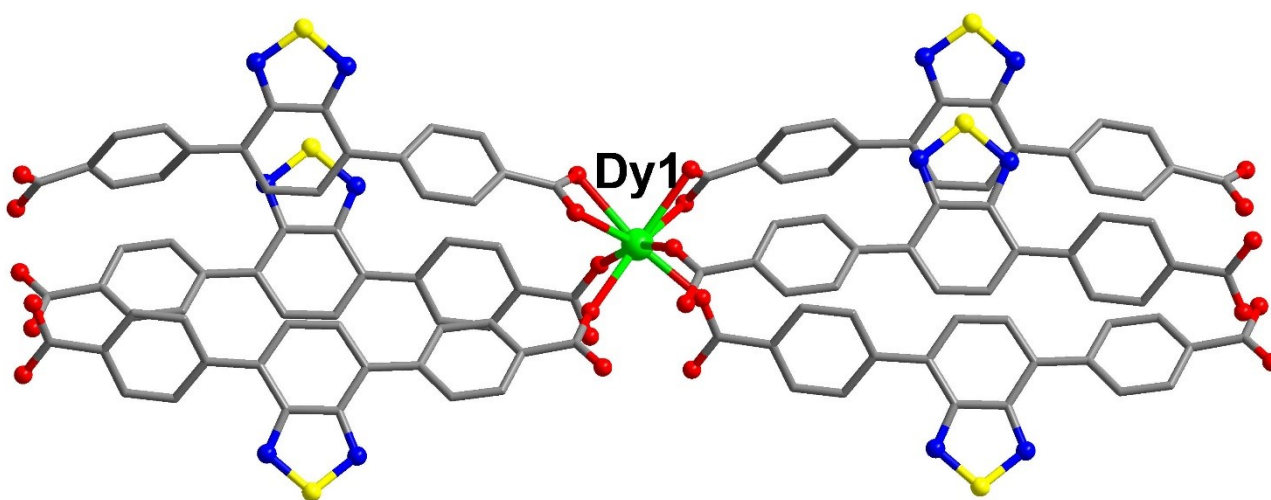**Figure S1.** The coordinated environment of Dy(III) ion.**Table S3.** SHAPE analysis of the Dy1 ion in MOL 1.

| Label    | Shape    | Symmetry                                   | Distortion(°) |
|----------|----------|--------------------------------------------|---------------|
| OP-8     | $D_{8h}$ | Octagon                                    | 34.914        |
| HPY-8    | $C_{7v}$ | Heptagonal pyramid                         | 22.286        |
| HBPY-8   | $D_{6h}$ | Hexagonal bipyramid                        | 12.267        |
| CU-8     | $O_h$    | Cube                                       | 6.700         |
| SAPR-8   | $D_{4d}$ | Square antiprism                           | 3.368         |
| TDD-8    | $D_{2d}$ | Triangular dodecahedron                    | 2.707         |
| JGBF-8   | $D_{2d}$ | Johnson gyrobifastigium J26                | 14.006        |
| JETBPY-8 | $D_{3h}$ | Johnson elongated triangular bipyramid J14 | 27.248        |
| JBTPR-8  | $C_{2v}$ | Biaugmented trigonal prism J50             | 4.471         |
| BTPR-8   | $C_{2v}$ | Biaugmented trigonal prism                 | 3.747         |
| JSD-8    | $D_{2d}$ | Snub diphenoid J84                         | 6.614         |
| TT-8     | $T_d$    | Triakis tetrahedron                        | 7.568         |
| ETBPY-8  | $D_{3h}$ | Elongated trigonal bipyramid               | 23.374        |

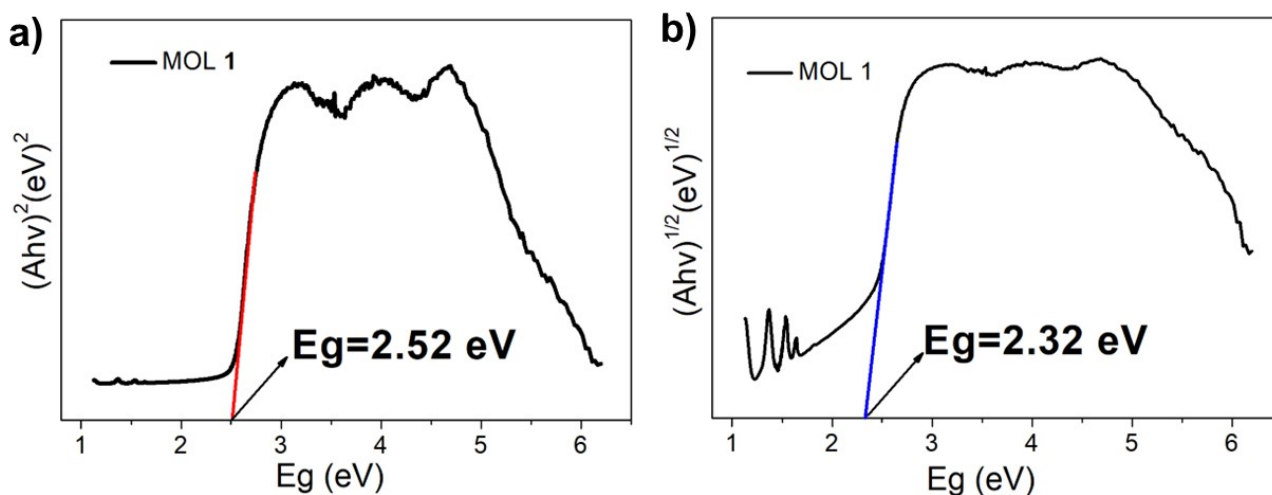

**Figure S2.** a)  $n = 2$ , the *Tauc* plot of MOL 1; b)  $n = 1/2$ , the *Tauc* plot of MOL 1.

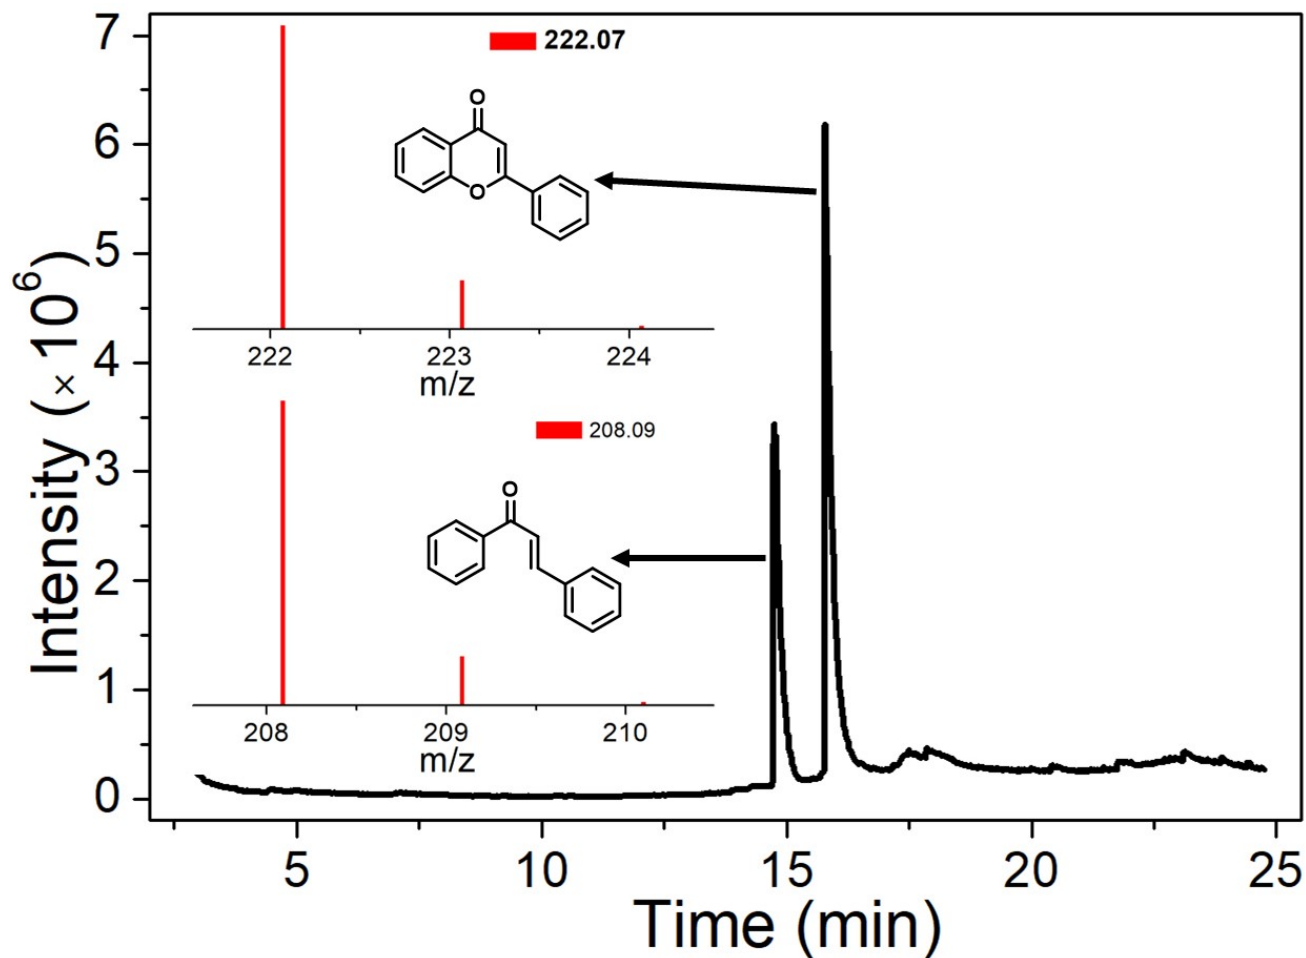

**Figure S3.** GC-MS spectrum of **1a** and **1c**.

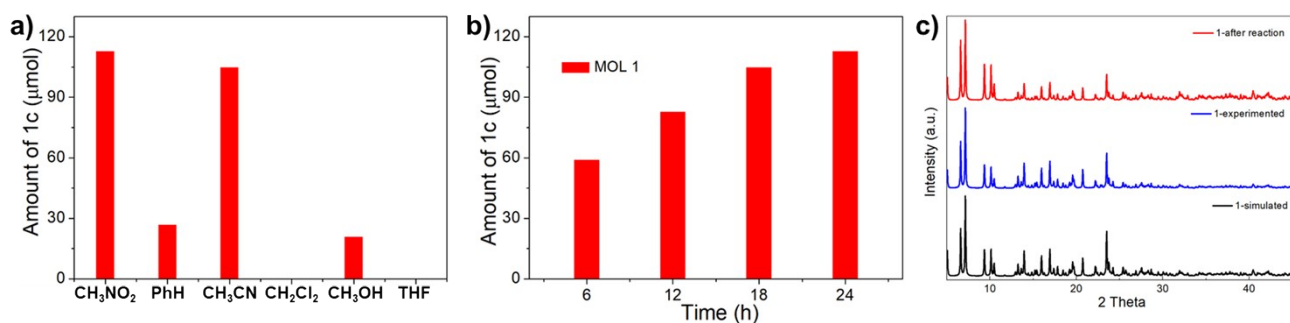

**Figure S4.** a) Yields of **1c** in different solvents; b) the influence of irradiation time on the amount of **1c**; c) the PXR D of photocatalyst **MOL 1**. The PXR D data suggests that the **MOL 1** is purity before reaction. After the reaction, only part of the peaks changed in height, and the peak position remained basically unchanged.

**Table S4.** Computed oxidation potential of chalcone.



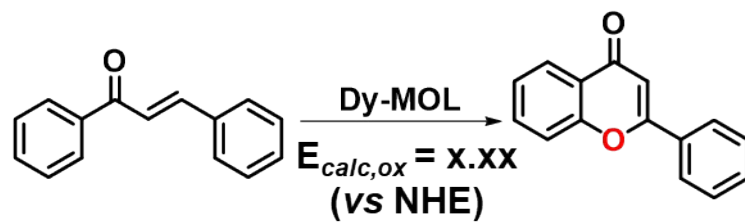

|        | $E_{calc,ox}$ |
|--------|---------------|
| E(NHE) | 0.66          |

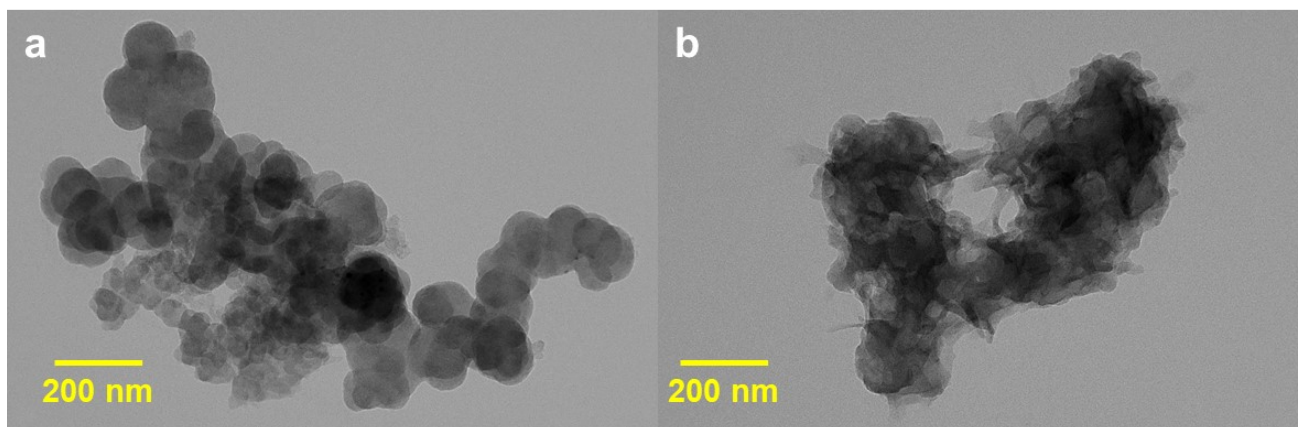

**Figure S5.** The TEM image for MOL 1 (a) and the morphology after reaction (b).

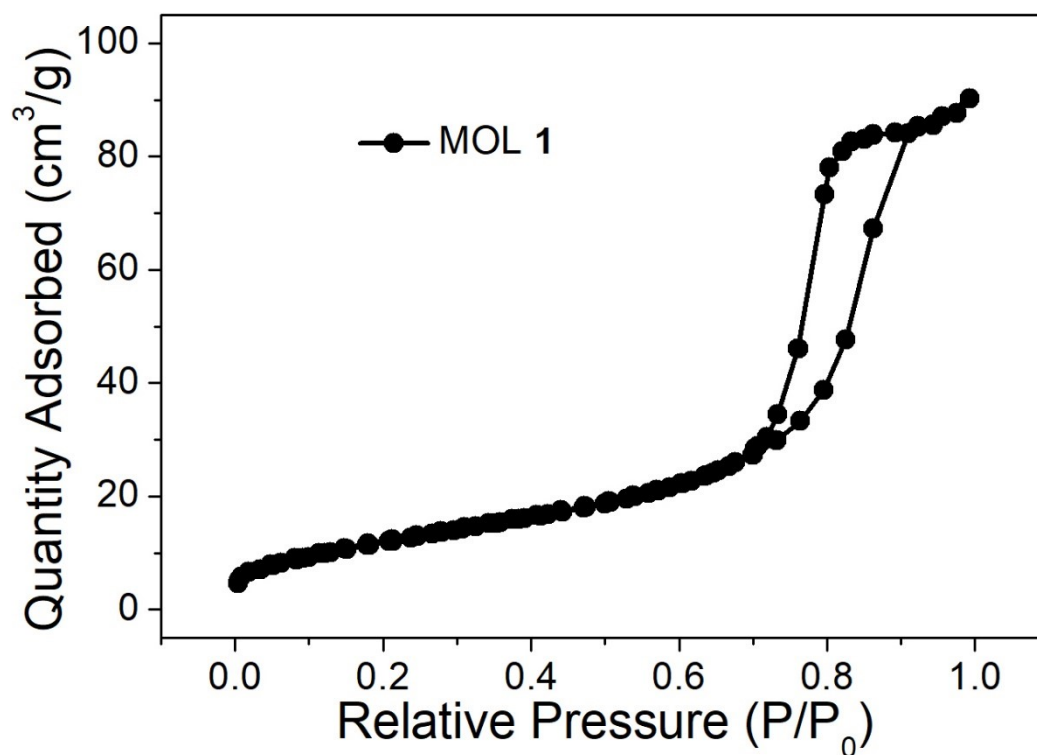

**Figure S6.** Isothermal adsorption/desorption curve of MOL 1.

**NMR Data:**

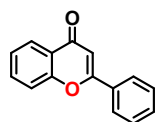

(1c): H NMR (600 MHz, )  $\delta$  8.23, 8.23, 8.22, 8.21, 7.93, 7.93, 7.93, 7.92, 7.92, 7.92, 7.92, 7.91, 7.91, 7.91, 7.91, 7.70, 7.70, 7.69, 7.69, 7.68, 7.68, 7.67, 7.57, 7.56, 7.55, 7.55, 7.53, 7.53, 7.53, 7.52, 7.52, 7.52, 7.52, 7.51, 7.51, 7.51, 7.50, 7.50, 7.50, 7.50, 7.49, 7.42, 7.42, 7.41, 7.41, 7.41, 7.40, 7.39, 6.83.

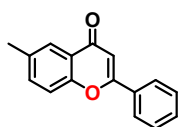

(1d): H NMR (600 MHz, )  $\delta$  8.01, 8.00, 8.00, 8.00, 8.00, 8.00, 7.92, 7.91, 7.91, 7.91, 7.91, 7.90, 7.90, 7.90, 7.90, 7.53, 7.53, 7.52, 7.52, 7.52, 7.51, 7.51, 7.51, 7.51, 7.50, 7.50, 7.50, 7.49, 7.49, 7.49, 7.49, 7.48, 7.46, 7.44, 6.81, 6.81, 2.45.

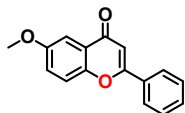

(1e): H NMR (600 MHz, )  $\delta$  7.91, 7.91, 7.91, 7.90, 7.90, 7.89, 7.59, 7.58, 7.52, 7.51, 7.50, 7.49, 7.48, 7.29, 7.29, 7.28, 7.28, 7.27, 7.27, 7.27, 7.25, 6.83, 6.82, 6.82, 3.90, 3.89.

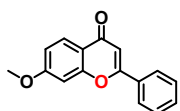

(1f): H NMR (600 MHz, )  $\delta$  8.13, 8.11, 7.90, 7.90, 7.89, 7.89, 7.88, 7.52, 7.52, 7.51, 7.51, 7.51, 7.50, 7.50, 7.25, 6.77, 3.92.

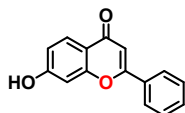

(1g): H NMR (600 MHz, )  $\delta$  11.88, 8.13, 8.12, 7.92, 7.91, 7.91, 7.91, 7.90, 7.90, 7.90, 7.89, 7.88, 7.53, 7.52, 7.51, 7.26, 7.26, 7.26, 7.26, 7.25, 7.25, 7.25, 7.25, 7.24, 7.24, 7.24, 7.24, 7.24, 7.24, 6.77, 6.39, 6.32.

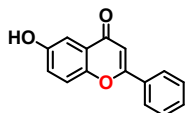

(1h): H NMR (600 MHz, )  $\delta$  9.93, 7.96, 7.95, 7.55, 7.25, 7.25, 7.25, 7.24, 7.24, 7.24, 7.24, 7.24, 6.77.

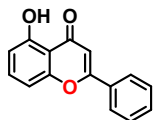

(1i): H NMR (600 MHz, )  $\delta$  7.91, 7.91, 7.91, 7.91, 7.90, 7.90, 7.90, 7.89, 7.89, 7.57, 7.57, 7.57, 7.56, 7.56, 7.56, 7.55, 7.55, 7.54, 7.54, 7.54, 7.53, 7.53, 7.52, 7.52, 7.52, 7.52, 7.51, 7.51, 7.51, 7.50, 7.25, 7.00, 7.00, 7.00, 6.99, 6.99, 6.98, 6.82, 6.81, 6.81, 6.80, 6.80, 6.80, 6.73, 6.73, 6.72, 6.72.

## Copies of $^1\text{H}$ NMR spectra

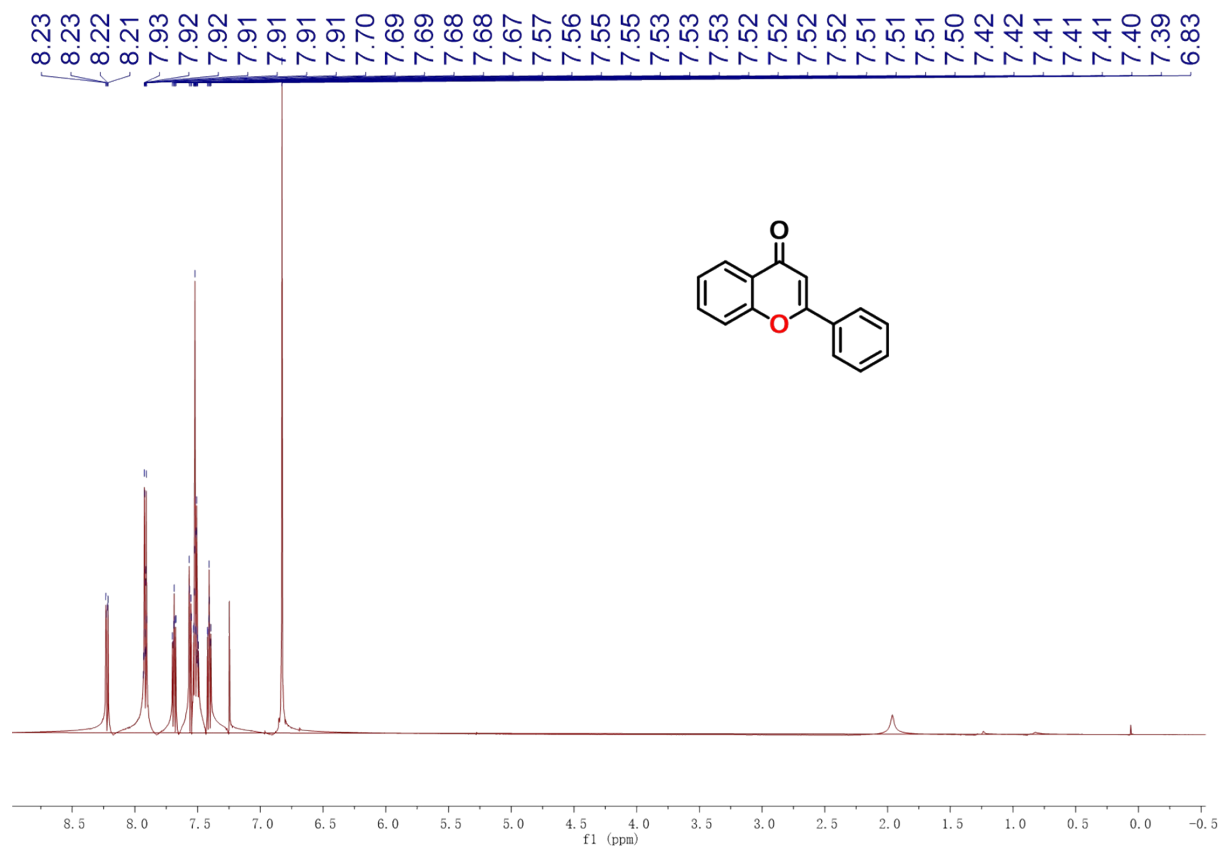

Figure S7.  $^1\text{H}$  NMR spectra for **1c**.

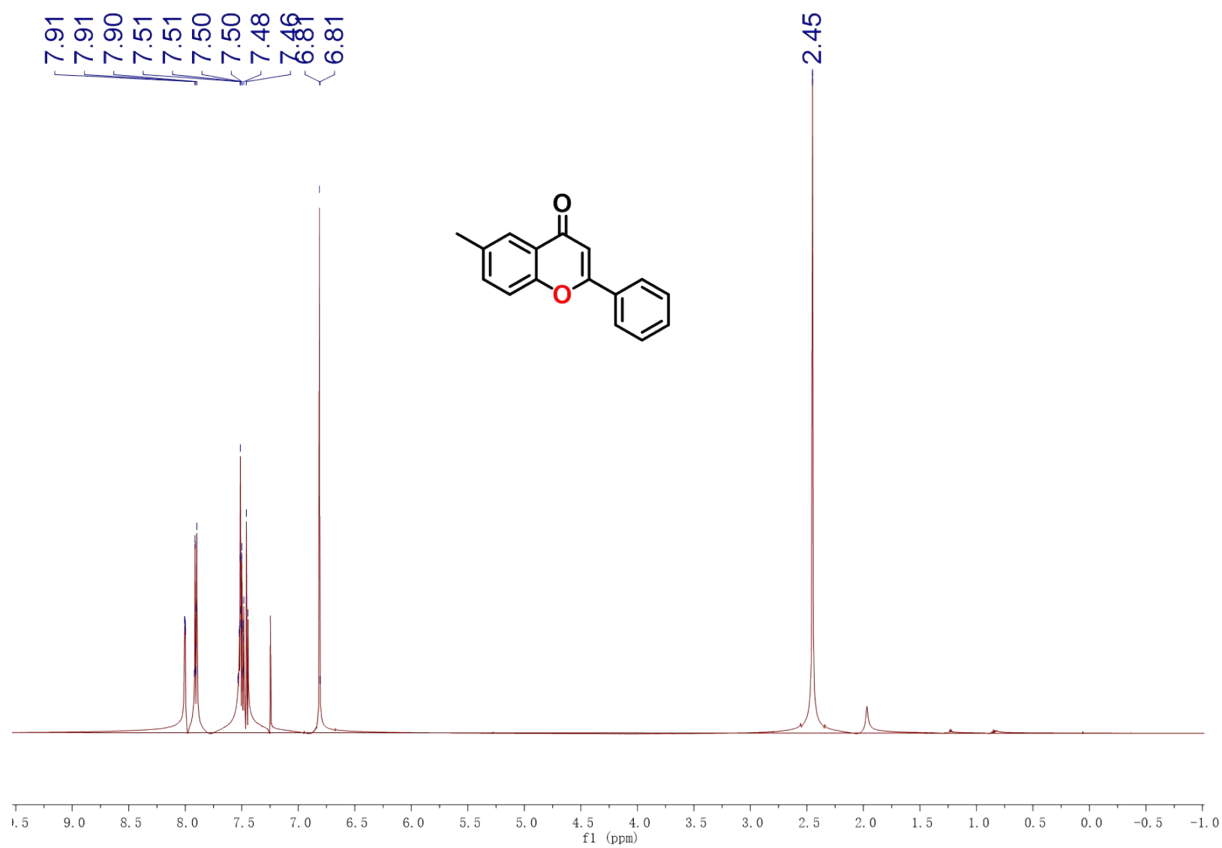

Figure S8.  $^1\text{H}$  NMR spectra for **1d**.

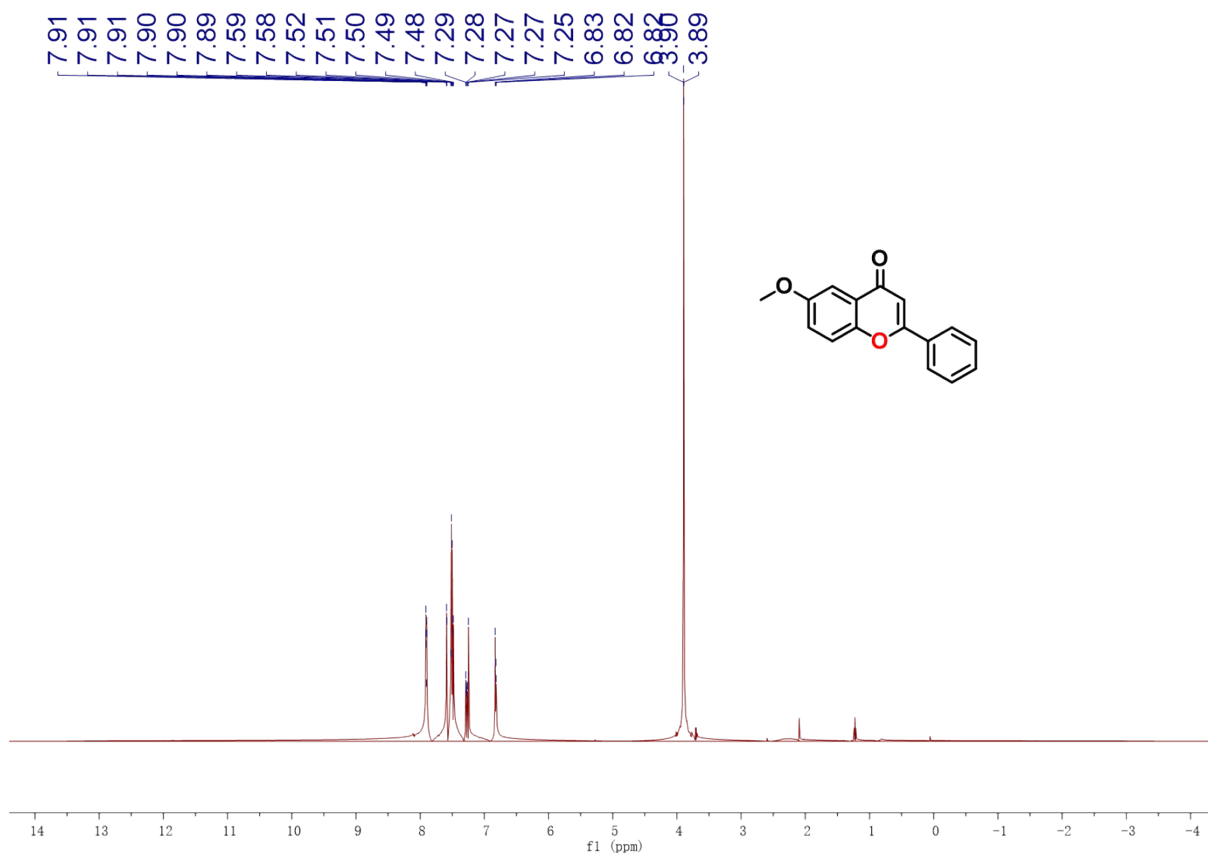

Figure S9. <sup>1</sup>H NMR spectra for 1e.

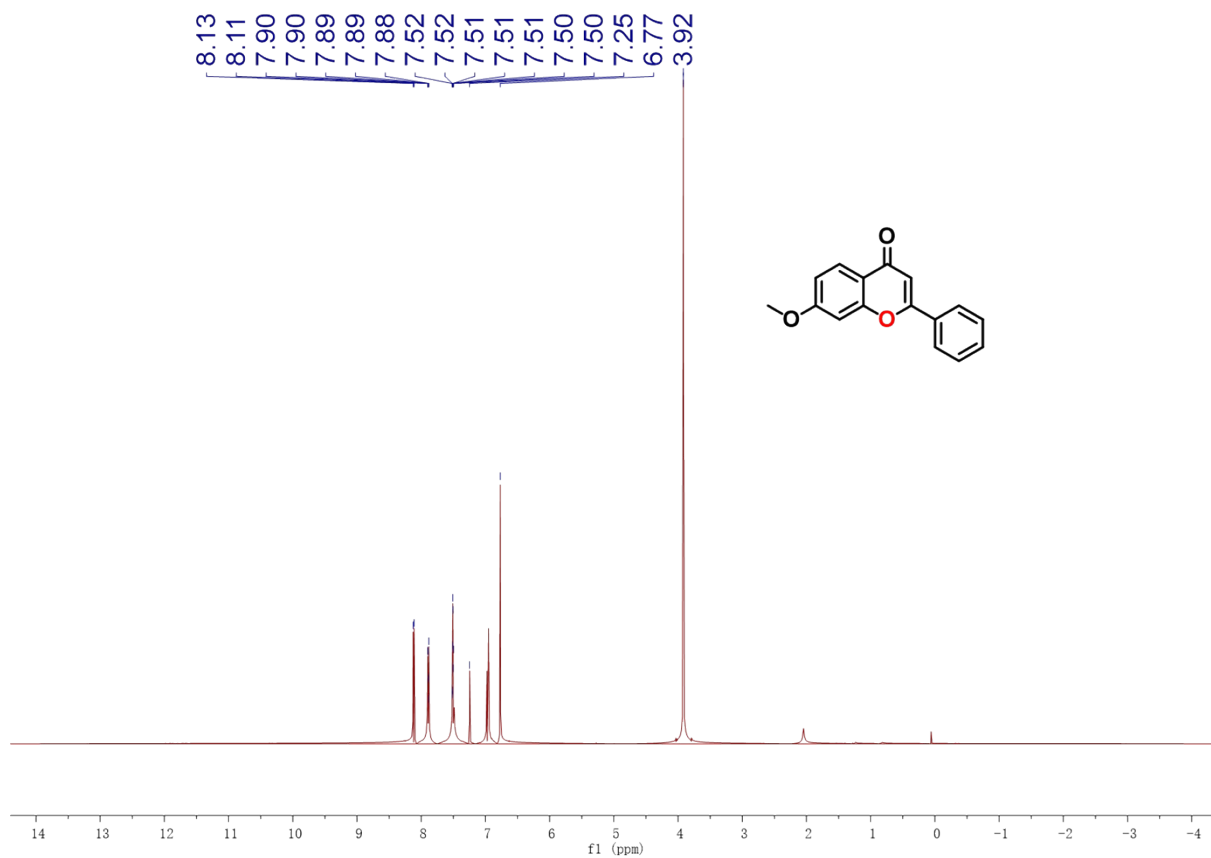

Figure S10. <sup>1</sup>H NMR spectra for 1f.



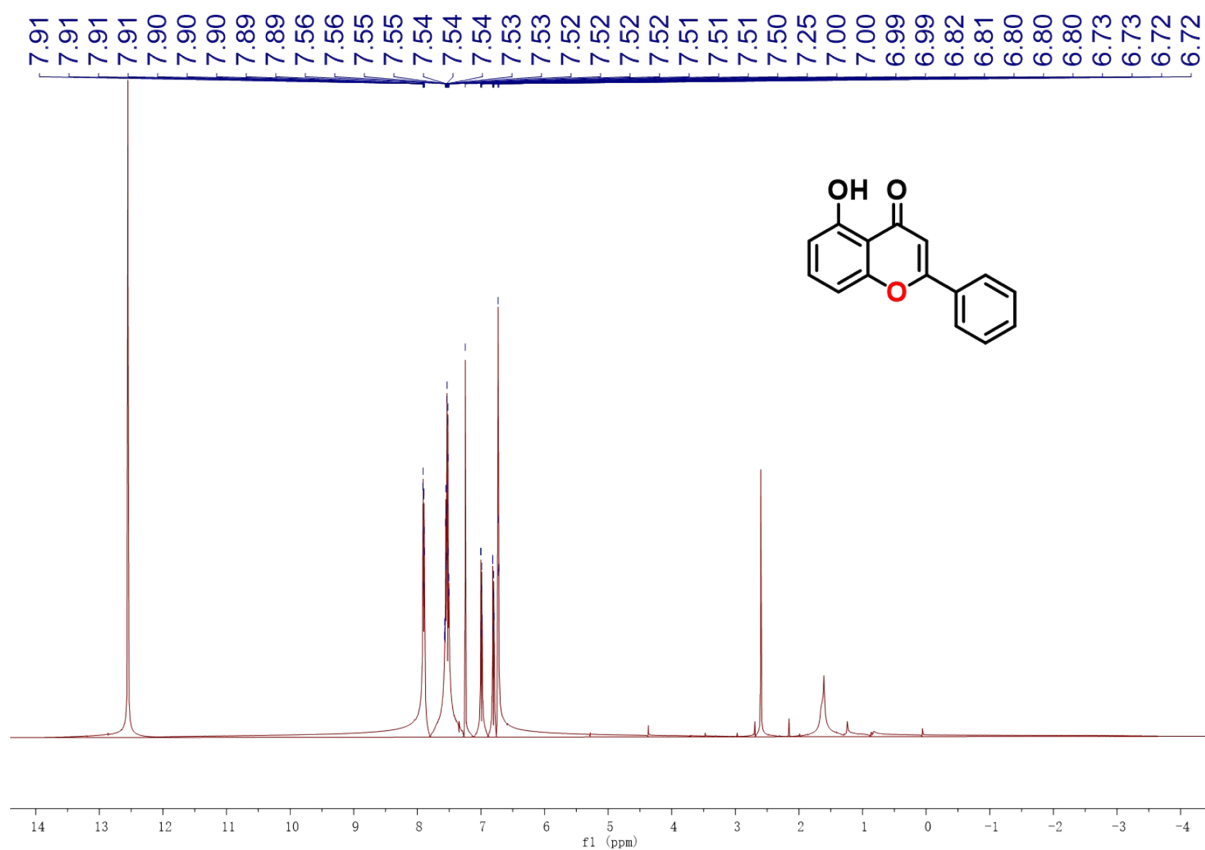

**Figure S13.**  $^1\text{H}$  NMR spectra for **1i**.

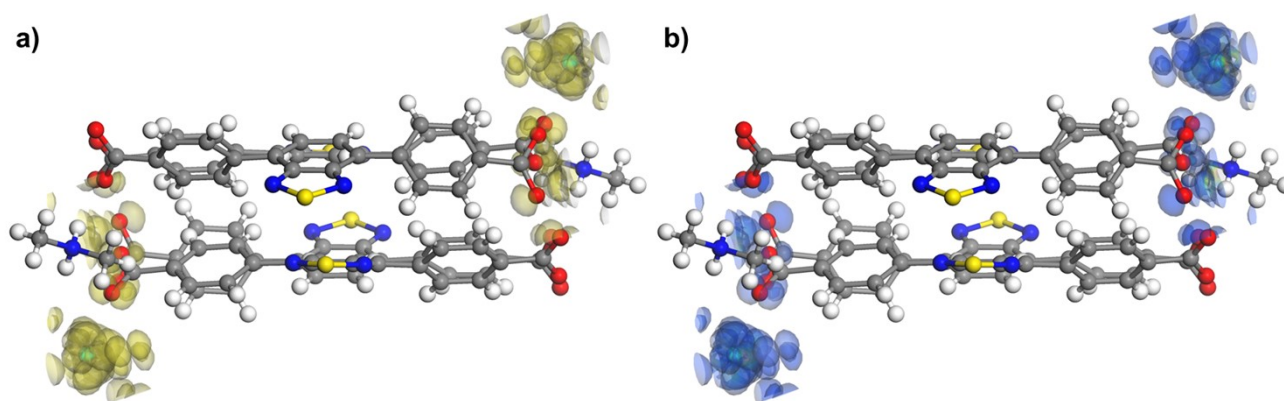

**Figure S14.** The calculated valence band hole (a) and conduction band electron (b) for MOL **1**.

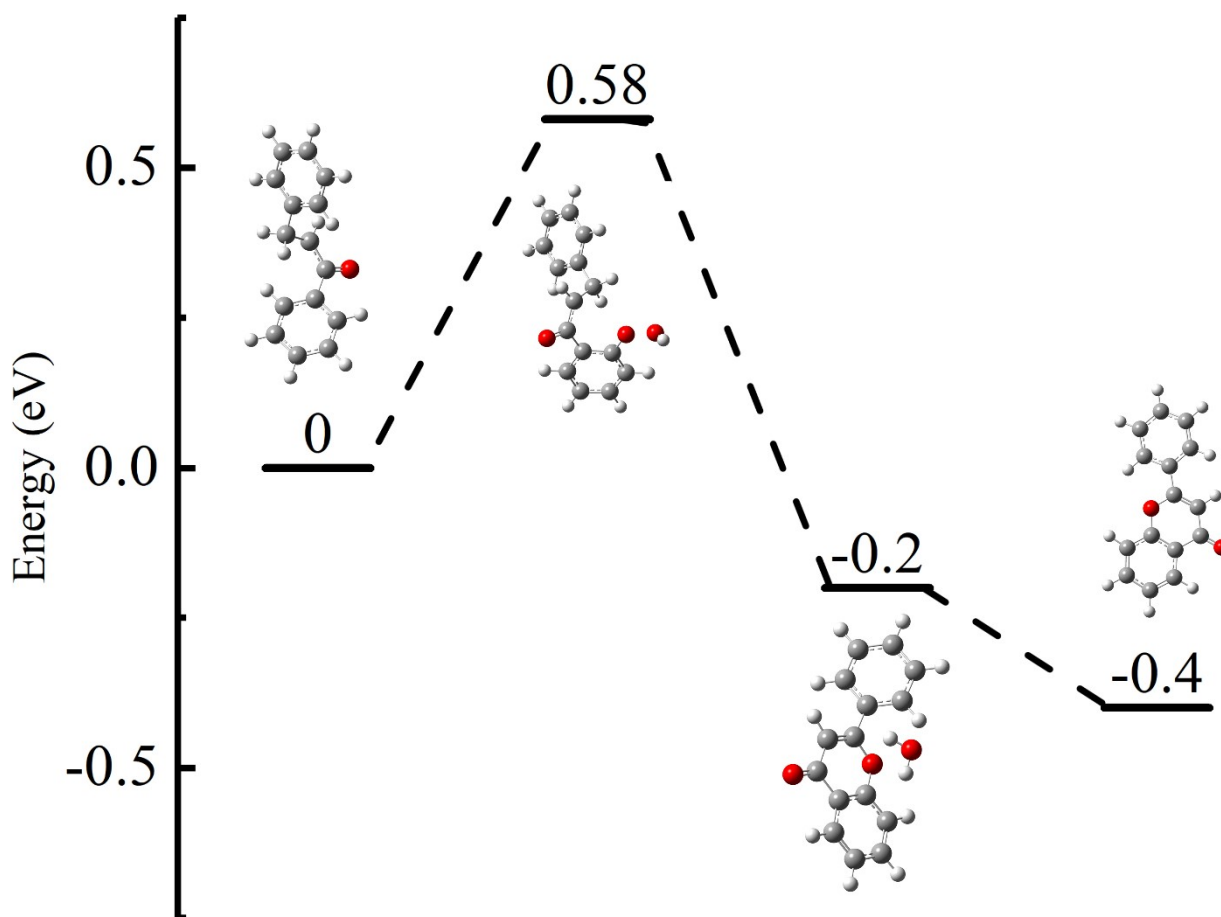

**Figure S15.** The  $E_{\text{ads}}$  of species involved in synthesizing flavonoid by chalcone with MOL 1.

#### References.

1. G. M. Sheldrick, *Acta Crystallogr., Sect. C: Struct. Chem.* **2015**, *71*, 3-8.
2. S. Alvarez, P. Alemany, D. Casanova, J. Cirera, M. Llunell, D. Avnir. *Coord. Chem. Rev.*, **2005**, *249*, 1693.
3. R. G. Parr, W. Yang, *Density-Functional Theory of Atoms and Molecules*, Oxford University Press, **1994**.
4. M. J. Frisch, G. W. Trucks, H. B. Schlegel, G. E. Scuseria, M. A. Robb, J. R. Cheeseman, G. Scalmani, V. Barone, G. A. Petersson, H. Nakatsuji, X. Li, M. Caricato, A. V. Marenich, J. Bloino, B. G. Janesko, R. Gomperts, B. Mennucci, H. P. Hratchian, J. V. Ortiz, A. F. Izmaylov, J. L. Sonnenberg, D. Williams-Young, F. Ding, F. Lipparini, F. Egidi, J. Goings, B. Peng, A. Petrone, T. Henderson, D. Ranasinghe, V. G. Zakrzewski, J. Gao, N. Rega, G. Zheng, W. Liang, M. Hada, M. Ehara, K. Toyota, R. Fukuda, J. Hasegawa, M. Ishida, T. Nakajima, Y. Honda, O. Kitao, H. Nakai, T. Vreven, K. Throssell, J. A. Montgomery, Jr., J. E. Peralta, F. Ogliaro, M. J. Bearpark, J. J. Heyd, E. N. Brothers, K. N. Kudin, V. N. Staroverov, T. A. Keith, R. Kobayashi, J.



---

Normand, K. Raghavachari, A. P. Rendell, J. C. Burant, S. S. Iyengar, J. Tomasi, M. Cossi, J. M. Millam, M. Klene, C. Adamo, R. Cammi, J. W. Ochterski, R. L. Martin, K. Morokuma, O. Farkas, J. B. Foresman, and D. J. Fox, Gaussian, Inc., Wallingford CT, **2019**.

5. Y. Zhao, D. G. Truhlar, *Theor. Chem. Acc.* **2008**, *120*, 215-241.
6. A. V. Marenich, C. J. Cramer, D. G. Truhlar, *J. Phy. Chem. B* **2009**, *113*, 6378-6396.
